# Supplementary material
Source: PubMed Central journal article supplement (PMC4636483)
Supplement: NIHMS679107-supplement-supplement_1.pdf [file NIHMS679107-supplement-supplement_1.pdf]

### Supplementary Table Effects of Numeracy Assessment Order on Numeracy Scores

| Survey 1      | Survey 2      | SNS 1 |      | SNS 2 |      | F ratio | p value | ONS 1 |      | ONS 2 |      | F ratio | p value |
|---------------|---------------|-------|------|-------|------|---------|---------|-------|------|-------|------|---------|---------|
|               |               | Mean  | sd   | Mean  | sd   |         |         | Mean  | sd   | Mean  | sd   |         |         |
| Berlin vs SNS | SNS vs Berlin | 4.11  | 1.03 | 4.15  | 1.03 | 0.09    | 0.78    | 1.11  | 0.87 | 1.06  | 1.00 | 0.10    | 0.76    |
| Weller vs SNS | SNS vs Weller | 4.64  | 0.76 | 4.64  | 0.76 | 0.08    | 0.78    | 4.62  | 1.88 | 4.29  | 2.14 | 0.73    | 0.40    |
| NUMI vs SNS   | SNS vs NUMI   | 4.23  | 0.95 | 4.17  | 0.96 | 0.11    | 0.74    | 5.75  | 1.58 | 6.19  | 1.35 | 2.74    | 0.10    |
| GHNT vs SNS   | SNS vs GHNT   | 4.40  | 1.06 | 4.29  | 1.11 | 0.25    | 0.62    | 3.47  | 1.64 | 3.45  | 1.81 | 0.00    | 0.97    |
| Lipkus vs SNS | SNS vs Lipkus | 4.09  | 0.99 | 3.95  | 1.05 | 0.65    | 0.42    | 6.93  | 2.86 | 7.30  | 2.35 | 0.68    | 0.41    |

Abbreviations: ONS = objective numeracy scale; NUMI = Numeracy Understanding in Medicine short form; GHNT = General Health Numeracy Test short form; Lipkus = Lipkus Expanded Numeracy Test; Berlin = Berlin Numeracy test, 4 item, multiple choice form; Weller = Weller Abbreviated Numeracy Scale; sd = standard deviation.
